1 **Ornithological and molecular evidence of a reproducing *Hyalomma rufipes***  
2 **population under continental climate in Europe**

3 Gergő Keve<sup>1,2\*</sup>, Tibor Csörgő<sup>3,4,5</sup>, Anikó Benke<sup>5,6</sup>, Attila Huber<sup>5,7</sup>, Attila Mórocz<sup>5,8</sup>, Ákos  
4 Németh<sup>5,9,10</sup>, Béla Kalocsa<sup>5</sup>, Enikő Anna Tamás<sup>5,11</sup>, József Gyurácz<sup>5,12</sup>, Orsolya Kiss<sup>5,13</sup>, Dávid  
5 Kováts<sup>4,5,14</sup>, Attila D. Sándor<sup>1,2,15</sup>, Zsolt Karcza<sup>5</sup>, Sándor Hornok<sup>1,2</sup>

6 <sup>1</sup>Department of Parasitology and Zoology, University of Veterinary Medicine, Budapest,  
7 Hungary

8  
9 <sup>2</sup>ELKH-ÁTE Climate Change: New Blood-sucking Parasites and Vector-borne Pathogens  
10 Research Group, Hungary

11  
12 <sup>3</sup>Department of Anatomy, Cell- and Developmental Biology, Eötvös Loránd University,  
13 Budapest, Hungary

14  
15 <sup>4</sup>Ócsa Bird Ringing Station, Ócsa, Hungary

16  
17 <sup>5</sup>BirdLife Hungary, Budapest, Hungary

18  
19 <sup>6</sup>Fenekpuszta Bird Ringing Station, Fenékpuszta, Hungary

20  
21 <sup>7</sup>Aggtelek National Park Directorate, Jósvalő, Hungary

22  
23 <sup>8</sup>Duna-Dráva National Park Directorate, Pécs, Hungary

24  
25 <sup>9</sup>Kiskunság National Park Directorate, Kecskemét, Hungary

26  
27 <sup>10</sup>Kiskunság Bird Protection Association, Izsák, Hungary

28  
29 <sup>11</sup>Faculty of Water Sciences, University of Public Service, Baja, Hungary

30  
31 <sup>12</sup>Department of Biology, Eötvös Loránd University, Savaria Campus, Szombathely, Hungary

32  
33 <sup>13</sup>Faculty of Agriculture, Institute of Animal Sciences and Wildlife Management, University  
34 of Szeged, Hódmezővásárhely, Hungary

35  
36 <sup>14</sup>Hungarian Biodiversity Research Society, Budapest, Hungary

37  
38 <sup>15</sup>Department of Parasitology and Parasitic Diseases, University of Agricultural Sciences and  
39 Veterinary Medicine, Cluj-Napoca, Romania

40  
41 \*corresponding author: [keve.gergo@univet.hu](mailto:keve.gergo@univet.hu)

42

43 **Abstract**

44

45 **Background:** Reports on adult *Hyalomma* ticks in certain regions of the Carpathian Basin  
46 date back to the 19<sup>th</sup> century. These ticks were thought to emerge from nymphs dropping  
47 from birds, then molting to adults. Although the role of migratory birds in carrying ticks of  
48 this genus is known from all parts of Europe, in most countries no contemporaneous  
49 multiregional surveillance of bird-associated ticks was reported which could allow the  
50 recognition of hotspots in this context.

51 **Methods:** Ixodid ticks were collected from birds at seven ringing stations in Hungary,  
52 including both the spring and autumn migration period in 2022. *Ixodes* and *Haemaphysalis*  
53 species were identified morphologically, whereas *Hyalomma* species molecularly.

54 **Results:** From 38 passeriform bird species 957 ixodid ticks were collected. The majority of  
55 developmental stages were nymphs (n=588), but 353 larvae and 16 females were also  
56 present. On most birds (n=381) only a single tick was found and the maximum number of  
57 ticks removed from the same bird was 30. Tick species were identified as *Ixodes ricinus*  
58 (n=598), *Ixodes frontalis* (n=18), *Ixodes lividus* (n=6), *Haemaphysalis concinna* (n=322), and  
59 *D. reticulatus* (n=1). All twelve *Hyalomma* sp. ticks (11 engorged nymphs and an unengorged  
60 larva) were identified as *Hyalomma rufipes* based on three mitochondrial markers. This  
61 species was only found in the Transdanubian region and along its southeastern border. The  
62 Common Blackbird (*Turdus merula*) and the European Robin (*Erithacus rubecula*) were the  
63 two main hosts of *I. ricinus* and *I. frontalis*, whereas *H. concinna* was almost exclusively  
64 collected from long-distance migrants. The predominant hosts of *H. rufipes* were reed-  
65 associated bird species, the Sedge Warbler (*Acrocephalus schoenobaenus*) and the Bearded

66 Reedling (*Panurus biarmicus*), both harboring these ticks at the end of June (i.e., the nesting  
67 period) in southwestern Hungary.

68 **Conclusions:** This study provides ornithological explanation for the regional, century-long  
69 presence of adult *Hyalomma* ticks under continental climate in the Transdanubian Region of  
70 the Carpathian Basin. More importantly, the autochthonous occurrence of a *H. rufipes*  
71 population was revealed for the first time in Europe, based on the following observations:  
72 (1) the bird species infested with *H. rufipes* are not known to migrate during their nesting  
73 period; (2) one larva was not yet engorged; (3) the larva and the nymphs must have  
74 belonged to different local generations; and (4) all *H. rufipes* found in the relevant location  
75 were identical in their haplotypes based on three maternally inherited mitochondrial  
76 markers, probably reflecting founder effect. This study also demonstrated that the species of  
77 ticks carried by birds were significantly different between collection sites even within a  
78 geographically short distance (200 km). Therefore, within a country multiregional monitoring  
79 is inevitable to assess the overall epidemiological significance of migratory birds in importing  
80 exotic ticks, and also in maintaining newly established tick species.

81 **Keywords:** bird migration; *Ixodes*; *Haemaphysalis*; *Hyalomma*; Central Europe; Hungary

82

### 83 **Background**

84 In the temperate zone of Europe, pathogens transmitted by hard ticks (Acari: Ixodidae) are  
85 responsible for the majority of the vector-borne diseases [1]. On this continent approx. 55  
86 ixodid species occur [2]. From among these, the number of tick species that are regarded as  
87 indigenous will likely increase in several countries, in part due to climate change and the  
88 emergence of new, thermophilic tick species from the south.

89           In this scenario, the first prerequisite for the establishment of new tick species in any  
90 region is their repeated introduction, for which a very important natural route is via bird  
91 migration. Migratory birds are long-known carriers of ticks, most importantly *Hyalomma*  
92 species, from the south to temperate regions of Europe [3], even its northernmost parts [4].  
93 However, birds usually carry immature ticks, larvae and nymphs of *Hyalomma* species [5],  
94 therefore in case of these thermophilic ticks, another crucial prerequisite prior to  
95 establishment is the ability of nymphs detaching from birds to molt to adults. This was  
96 already reported for both *Hyalomma marginatum* and *Hyalomma rufipes* from several  
97 countries north of the Mediterranean Basin, as exemplified by the UK [6] and the  
98 Netherlands [7] in western Europe, or Hungary in central Europe [8]. Consequently,  
99 *Hyalomma* adults might also overwinter [9], increasing the chances for future establishment  
100 of permanent, reproductive populations.

101           Recently, the emergence of *Hyalomma marginatum* was reported in a previously  
102 non-endemic region of the Mediterranean Basin in southern France, but it was stated that  
103 even in such newly invaded areas this tick species probably remains exclusively  
104 Mediterranean and cannot expand outside this climatic range [10]. On the other hand, north  
105 of the Mediterranean region, in the Carpathian Basin (geographically including both Hungary  
106 and the Transylvanian Basin: [11]), adult ticks from the genus *Hyalomma* are long-known for  
107 their autochthonous occurrence under continental climate. This was already reported in the  
108 19th century [12], and later confirmed [13,14]. At the same time, in the absence of detailed  
109 morphological description, the species in the Carpathian Basin remained uncertain, because  
110 some hints were more relevant to *H. rufipes* (e.g., the name *Hyalomma aegyptium*: [14]),  
111 while others to *H. marginatum* (as implied in the predominance of the species referred to  
112 from Hungary in the Mediterranean Basin: [13]). More recently, *H. rufipes* adults were found

113 on cattle on two occasions in Hungary [8], and one adult on the same host species 10 years  
114 later by citizen science method [15].

115 Interestingly, these century-long reports on the presence of adult *Hyalomma* ticks in  
116 the Carpathian Basin attest that the chance for their occurrence is more likely in certain  
117 endemic areas of the country. However, this hypothesis was not yet tested from the point of  
118 view of bird migration, despite the long-known import of *Hyalomma* nymphs by birds into  
119 this geographical region [16]. In light of the above, the aim of this study was to  
120 perform a pilot survey focusing on the comparison of tick species carried or imported by  
121 birds at various locations in Hungary. These locations were meant to represent most of the  
122 Carpathian Basin where important stopover sites can be found along the Adriatic Flyway of  
123 bird migration.

124

## 125 **Methods**

### 126 **Sample collection**

127 In this study, birds mist-netted at seven ringing stations (Figure 1) by standard ornithological  
128 mist-nets (mesh size 16 mm) were examined for the presence of ticks, between March and  
129 November, 2022. The main characteristics of ringing stations are as follows:

130 (1) Tömörd Bird Ringing Station (coordinates: 47°21'N, 16°39'E): situated in northwestern  
131 Hungary, next to a small lake. It is surrounded by cultivated lands, bushes and deciduous  
132 forest, predominantly oak trees.

133 (2) Ócsa Bird Ringing Station (47°19'N, 19°13'E): situated in north central Hungary, on the  
134 edge of a wetland. It is surrounded by arable fields, poplar plantations with several  
135 interspersed open-pit gravel mines [17].

136 (3) Bódva Valley Bird Ringing Station (coordinates: 48°27'N, 20°42'E): situated in  
137 northeastern Hungary, and located in the valley of Bódva River. The river is surrounded by  
138 the mosaics of gallery forests, wet meadows, *Prunus* scrubs and arable lands. The adjacent  
139 hillsides are covered mostly by oak forests.

140 (4) Fenékpuszta Bird Ringing Station (46°44'N, 17°14'E): situated in southwestern Hungary,  
141 next to the largest lake in Central Europe, Lake Balaton. The vegetation type is  
142 predominantly reed.

143 (5) Izsák, Lake Kolon Bird Ringing Station (coordinates: 46°46'N, 19°19'E): situated in central  
144 Hungary, across Lake Kolon in the reedbed. The vegetation type is typical for marshes,  
145 heavily covered with reeds. It is surrounded by cultivated lands and planted forests.

146 (6) Dávod, Lake Földvár Bird Ringing Station (coordinates: 46°0'N, 18°51'E): situated in south  
147 central Hungary on the shores of Lake Földvár which is an oxbow lake, that was formed  
148 naturally from river Danube. The lake is surrounded by reedbed. Sand Martins (*Riparia*  
149 *riparia*) were ringed in the sand mines of Baja (coordinates: 46°12'N, 18°58'E) which are close  
150 to this area.

151 (7) Lake Fehér Ornithology Camp (coordinates: 46°20'N, 20°6'E). The camp is located near to  
152 Lake Fehér, which is large fishpond system the greatest saline lake. The vegetation type is  
153 reedbed with sparse shrubs and trees.

154 Ticks were removed from the skin of birds with fine tweezers and stored in 96%  
155 ethanol. Data of collection (date, location, avian host species, ring number) were recorded.  
156 *Ixodes* and *Haemaphysalis* species were identified morphologically [2], whereas *Hyalomma*  
157 species molecularly as outlined below.

158 For data comparison and presentation, ornithological traits were assigned to bird  
159 species according to Csörgő et al. [18]. English bird species names are capitalized in  
160 accordance with the international recommendations ([https://bou.org.uk/british-list/bird-](https://bou.org.uk/british-list/bird-names/)  
161 [names/](https://bou.org.uk/british-list/bird-names/)).

162

### 163 **DNA extraction**

164 Ticks of the genus *Hyalomma* were disinfected on their surface with sequential washing for  
165 15 s in 10% NaClO, tap water and distilled water. For the DNA extraction, the larva was used  
166 without incision, whereas nymphs were cut dorsally on the idiosoma. DNA was extracted  
167 with the QIAamp DNA Mini Kit (QIAGEN, Hilden, Germany) according to the manufacturer's  
168 instruction, including an overnight digestion in tissue lysis buffer and Proteinase-K at 56 °C.  
169 Extraction controls (tissue lysis buffer) were also processed with the tick samples to monitor  
170 cross-contamination.

171

### 172 **Molecular identification of *Hyalomma* species**

173

174 The cytochrome oxidase subunit I (*cox1*) gene was chosen as the first target for molecular  
175 analysis. The PCR was modified from Folmer et al. [19] and amplifies an approx. 710-bp-long  
176 fragment of the gene. The primers HCO2198 (5'-TAA ACT TCA GGG TGA CCA AAA AAT CA-3')  
177 and LCO1490 (5'-GGT CAA CAA ATC ATA AAG ATA TTG G-3') were used in a reaction volume  
178 of 25 µl, containing 1 U (stock 5 U/µl) HotStarTaq Plus DNA Polymerase, 2.5 µl 10× CoralLoad  
179 Reaction buffer (including 15 mM MgCl<sub>2</sub>), 0.5 µl PCR nucleotide Mix (stock 10 mM), 0.5 µl of  
180 each primer (stock 50 µM), 15.8 µl ddH<sub>2</sub>O and 5 µl template DNA. For amplification, an  
181 initial denaturation step at 95 °C for 5 min was followed by 40 cycles of denaturation at 94

182 °C for 40 s, annealing at 48 °C for 1 min and extension at 72 °C for 1 min. Final extension was  
183 performed at 72 °C for 10 min.

184 Another PCR was used to amplify an approx. 460-bp-fragment of the 16S rDNA gene  
185 of Ixodidae [20], with the primers 16S+1 (5'-CTG CTC AAT GAT TTT TTA AAT TGC TGT GG-3')  
186 and 16S-1 (5'-CCG GTC TGA ACT CAG ATC AAG T-3'). Other reaction components, as well as  
187 cycling conditions were the same as above, except for annealing at 51 °C. In addition, a  
188 conventional PCR reaction was used with the primer pairs T1B (5'-AAA CTA GGA TTA GAT  
189 ACC CT-3') and T2A (5'-AAT GAG AGC GAC GGG CGA TGT-3') to amplify an approx. 360-bp-  
190 long fragment from the 12S rRNA gene from all DNA extracts [21,22]. The PCR was modified  
191 with the following conditions. An initial denaturation step at 95 °C for 5 min was followed by  
192 5 cycles of denaturation at 94 °C for 30 s, annealing at 50 °C for 30 s and extension at 72 °C  
193 for 30 s and 30 cycles of denaturation at 94 °C for 30 s, annealing at 53 °C for 30 s and  
194 extension at 72 °C for 30 s. Final extension was performed at 72 °C for 7 min [22,23].

195

## 196 **Sequencing**

197

198 In all PCRs non-template reaction mixture served as negative control. Extraction controls and  
199 negative controls remained PCR negative in all tests. Purification and sequencing of the PCR  
200 products were done by Biomi Ltd. (Gödöllő, Hungary). Quality control and trimming of  
201 sequences were performed with the BioEdit program, then alignment with GenBank  
202 sequences by the nucleotide BLASTN program (<https://blast.ncbi.nlm.nih.gov>). New  
203 sequences were submitted to GenBank (*cox1*: OQ108291-OQ108294, 16S rRNA: OQ103402-  
204 OQ103405, 12S rRNA: OQ103398-OQ103401).

205



206 **Statistical analyses**

207

208 Fisher exact test was used to compare prevalence rates and differences were regarded  
209 significant if  $P < 0.05$ .

210

211

212 **Results**

213 **(1) Species and developmental stages of ticks infesting birds**

214

215 During 2022, 540 individuals of 38 passeriform bird species were found to be tick-infested,  
216 from which altogether 957 ixodid ticks were collected. The majority of developmental stages  
217 were nymphs ( $n=588$ ), but 353 larvae and 16 females were also present. On most birds  
218 ( $n=381$ ) only a single tick was found. The maximum number of ticks removed from a single  
219 bird was 30, and the mean intensity of tick-infestation was 1.78 tick/tick-infested bird in the  
220 whole study period.

221 Based on morphological characteristics, the ticks belonged to the following species:

222 *Ixodes ricinus* ( $n=598$ ), *Ixodes frontalis* ( $n=18$ ), *Ixodes lividus* ( $n=6$ ), *Haemaphysalis concinna*  
223 ( $n=322$ ), and *D. reticulatus* ( $n=1$ ) (Supplementary Table 1). Morphologically, the twelve  
224 *Hyalomma* sp. ticks could only be identified on the genus level and their molecular  
225 identification was necessary. All *Hyalomma* nymphs were in a similar, advanced state of  
226 engorgement, but the single larva was flattened, apparently unengorged.

227 Based on the 16S rRNA gene, *Hyalomma* nymphs belonged to three haplotypes  
228 (Table 1). One of these collected in south Hungary (OQ103402) had 100% (383/383 bp)  
229 sequence identity to *H. rufipes* previously collected from a bird in north-central Hungary

230 (Ócsa: KU170517) and another in Egypt (MK737650). The second haplotype (collected in  
231 northwest Hungary: OQ103403) differed in two, and the third haplotype (all other  
232 specimens: OQ103404-OQ103405) in one position of their 16S rRNA sequence, meaning  
233 99.5% and 99.7% sequence identities to the above two reference sequences, respectively  
234 (Table 1). One haplotype (OQ108291) differed in one position, whereas all other *H. rufipes*  
235 specimens were 100% (645/645 bp) identical in the sequenced part of their *cox1* gene  
236 (OQ108292-OQ108294) to a tick collected from Eurasian Reed Warbler (*Acrocephalus*  
237 *scirpaceus*) in the Netherlands (MT757612) and another reported from Malta (OL339477).  
238 Interestingly, these *cox1* sequences were even more different (in two bps) from *H. rufipes*  
239 collected from a bird in a previous study in north-central Hungary (Ócsa: KU170491). In  
240 addition, all *H. rufipes* nymphs and the larva had identical 12S rRNA sequences (OQ103398-  
241 OQ103401), with 100% (341/341 bp) sequence identity to ticks collected from birds in Malta  
242 (OL352890) and in Italy (MW175439). Thus, the genus *Hyalomma* was exclusively  
243 represented by *H. rufipes* (n=12).

244

## 245 **(2) Host-associations of tick species and the migratory habits of their avian hosts**

246

247 Associations of ticks collected in this study with different bird species are summarized in  
248 Supplementary Table 2. The Common Blackbird (*Turdus merula*) (n=58) and the European  
249 Robin (*Erithacus rubecula*) (n=105) were the two main hosts of *I. ricinus* in both the spring  
250 and the autumn tick collection periods. The preferred hosts of *I. frontalis* were also these  
251 two bird species (n= 4 and 5, respectively). *Haemaphysalis concinna* most often infested the  
252 Sedge Warbler (*Acrocephalus schoenobaenus*) (n=49) and Savi's Warbler (*Locustella*  
253 *luscinioides*) (n=65) (Supplementary Table 2). *Hyalomma rufipes* was only collected on

254 repeated occasions from Sedge Warblers (*A. schoenobaenus*) and Bearded Reedling (*Panurus*  
255 *biarmicus*), and once from a Common Whitethroat (*Curruca communis*) and from a European  
256 Pied Flycatcher (*Ficedula hypoleuca*). *Ixodes lividus* was only found once, on its specific host,  
257 the Sand Martin (*Riparia riparia*). Importantly, with the exception of the accidental finding of  
258 a single *D. reticulatus* female on a Common Blackbird, all other females (n=16) belonged to  
259 the two ornithophilic tick species *I. frontalis* (n=9) and *I. lividus* (n=6).

260           During the spring, at the ringing station in north-central Hungary (Ócsa) where  
261 the highest number of tick-infested birds were caught and which contributed the most  
262 balanced ratio of birds with different migratory habits to the study, there was a highly ( $P <$   
263 0.0001) significant difference between the host associations of *I. ricinus* and *H. concinna*,  
264 since the former predominated on resident and short-distance migrant bird species, but *H.*  
265 *concinna* on long-distance migrants. In the autumn, taking into account all ringing stations,  
266 the difference between these two tick species in the same comparison, and the association  
267 of *I. frontalis* with resident and short-distance migrant bird species was also highly significant  
268 ( $P < 0.0001$ ).

269

### 270 **(3) Spatiotemporal occurrence of tick species**

271

272 *Ixodes ricinus* and *H. concinna* were found to infest birds in both the spring and autumn  
273 collection periods (Figure 1), whereas the presence of *H. rufipes* was restricted to the first  
274 half of the year (Figure 1, Table 1), and *I. frontalis* predominated in the autumn period  
275 (Figure 1). Importantly, *H. rufipes* was collected from long-distance migrant birds in south  
276 and northwest Hungary in May and April, respectively (Table 1). However, all other

277 specimens of this species were removed from birds in the middle of summer (late June) at  
278 one ringing station in the southwestern part of the country (Fenékpuszta).

279         During the spring period, *I. ricinus* was the predominant tick species in the north,  
280 whereas *H. concinna* in central and south Hungary (Figure 1, Supplementary Table 1).  
281 However, in the autumn, *I. ricinus* represented the highest number of ticks from birds in  
282 north as well as in southwestern parts of the country, and *H. concinna* at two ringing  
283 stations, in central and southeast Hungary (Figure 1). *Hyalomma rufipes* was only found in  
284 the Transdanubian region and in one case along the southern reach of the Danube. On the  
285 other hand, *I. frontalis* could only be collected in northern and central locations during both  
286 spring and autumn and was absent from birds in southern parts of the country (Figure 1).

287         Taken together, *I. ricinus* and *H. concinna* occurred on birds at all sampling sites, but  
288 their ratio was different according to these sites and semiannual periods. At the same time,  
289 the spatiotemporal distribution was limited in case of *H. rufipes* and *I. frontalis*.

290

## 291 **Discussion**

292

293 In Hungary, studies on tick-infestations of birds date back to more than half a century [16],  
294 and have been ever since extensively performed on annual or tri-annual bases focusing on  
295 the same ringing station in the north-central part of the country (Ócsa: [24–26]). Similar  
296 reports on ticks from avian hosts are available from numerous European countries, as  
297 exemplified by Sweden [27], The Netherlands and Belgium [28], Germany [29] or Italy [30].  
298 Relevant studies have also been reviewed recently [31,32]. However, discounting  
299 opportunistic and sporadic collections of ticks from birds, the present study is the first  
300 “horizontal tick survey” from birds in the Carpathian Basin and probably also in a broader

301 geographical context. This implies that ticks were removed and their species identified at  
302 several ringing stations simultaneously in the course of one year, allowing not only the  
303 regional comparison of tick burdens carried by birds, but also assessing the significance and  
304 need of similar studies on a larger, continental scale.

305 In this study, six species of ixodid ticks (three prostriate and three metastriate) were  
306 collected from birds. The most significant finding related to tick species diversity was the *H.*  
307 *rufipes*-infestation of three long-distance migrant and a resident bird species. Importantly, *H.*  
308 *rufipes* was collected in south and northwestern Hungary during late spring in 2022, as in a  
309 previous study [26]. However, in this study all remaining 10 specimens were removed from  
310 birds in the middle of summer (late June) at one ringing station in the southwestern part of  
311 the country (Fenékpuszta), i.e., in the same county (Zala) where *Hyalomma*-infestation of a  
312 bird was diagnosed for the first time in Hungary in 1955 [16]. In the same region, *Hyalomma*  
313 sp. ticks were reported to occur [33] and *H. rufipes* adults were identified on two occasions  
314 from cattle [8] (Figure 1.A).

315 It is utterly unlikely that all five individuals of the two avian host species of these 9  
316 fully engorged nymphs and one unengorged larva of *H. rufipes* (sampled on June 26) carried  
317 these ticks into Hungary from abroad. *Hyalomma rufipes* has a two-host life cycle, and  
318 engorged nymphs drop off from the host after 21-29 days of infestation [34]. One of the  
319 avian hosts shown to harbor nymphs of *H. rufipes* in this study, the Sedge Warbler (*A.*  
320 *schoenobaenus*) typically arrives in Hungary from the wintering grounds in Africa between  
321 April and early May [18], and late June (when its *Hyalomma*-infestation was diagnosed) is in  
322 the middle of its nesting period, without migration. On the other hand, the other repetitive  
323 host of *H. rufipes* in this study, the Bearded Reedling (*P. biarmicus*) is an *a priori* resident bird

324 species, with rarely documented limited movements, but according to ringing data [18]  
325 these "vagrancies" never occur in its summer nesting period.

326       Regarding the results of molecular analyses, it is not surprising that all *H. rufipes*  
327 individuals collected in 2022 from birds in Hungary (n=12) had identical 12S rRNA  
328 haplotypes, because this genetic marker was shown to be identical in case of a much larger  
329 set of *H. rufipes* ticks (n=48) collected from birds with probably different geographical origin  
330 [35]. However, in this study the sequenced part of the *cox1* gene was also identical between  
331 all *H. rufipes* (n=11) collected in the Transdanubian part of Hungary, in particular in case of  
332 those 10 ticks which were removed from birds at the same ringing station in southwest  
333 Hungary (Fenékpuszta). *Hyalomma rufipes* was shown to differ remarkably in its *cox1*  
334 haplotype in case of ticks carried by birds with different geographical origin [35]. Moreover,  
335 the ratio and presence or absence of certain *Hyalomma cox1* haplotypes were demonstrated  
336 to be site- and population-specific, usually with multiple haplotypes even within the same  
337 population [36]. Therefore, finding of exclusively one *cox1* haplotype among 10 *H. rufipes*  
338 ticks collected in one location (Fenékpuszta) raises the possibility that these ticks represent  
339 the same population. Their genetic similarity is probably a consequence of founder effect.  
340 Taken together, all three studied mitochondrial, maternally inherited genetic markers were  
341 identical only between *H. rufipes* individuals collected in the latter place, also supporting the  
342 common maternal aborigine of these ticks.

343       In addition, the apparently unengorged state of the *H. rufipes* larva on one of these  
344 birds also argues against the foreign origin of its tick-infestation. Note that in a previous  
345 study only molting (i.e., advanced stage) *H. marginatum* larvae were found on birds in  
346 Hungary, and all other stages were nymphs [25,26]. Importantly, hitherto molecularly  
347 verified *H. rufipes* larvae were only reported from birds in south European countries

348 (reviewed by Keve et al. [32]), and typically only nymphs of this tick species arrive on birds in  
349 countries north of the Mediterranean Basin if these originate from Africa (Figure 2; [32]).

350 Obviously, not all ticks carried by migratory birds in the spring were imported by  
351 them from southern countries, and this is particularly relevant to those avian hosts which  
352 arrive from their wintering grounds during the activity peak of local tick populations.  
353 Similarly to previous bird tick studies in the Carpathian Basin [26] and most countries north  
354 of the Mediterranean Basin (e.g., [27]), *I. ricinus* was the tick species most commonly  
355 collected from birds in 2022 in Hungary. *Haemaphysalis concinna* was the second most  
356 abundant tick species on birds, which, however, seems to be unique to the Carpathian Basin  
357 and its region [32]. Both of these tick species (*I. ricinus*, *H. concinna*) indigenous to Hungary  
358 tend to infest birds which arrive in their main activity periods [37], therefore *I. ricinus* (peak  
359 activity: April) is mainly found on residents and short-distance migrants (typically arriving  
360 early spring), whereas *H. concinna* (peak activity: May) on long-distance migrants (usually  
361 arriving late spring) [18].

362 New tick-host associations revealed in this study include the presence of *H. rufipes* on  
363 the Bearded Reedling (*P. biarmicus*), and infestation of Moustached Warbler (*Acrocephalus*  
364 *melanopogon*) with *H. concinna*. Although *D. reticulatus* seldom occurs on birds [32], its  
365 immature developmental stages were reported from avian hosts (including the Common  
366 Blackbird, *T. merula*) [38]. The collection of its adult on a Blackbird during this study is  
367 probably an accidental finding.

368 Considering the regional occurrence of tick species on birds in the Carpathian Basin,  
369 *H. concinna* is a thermophilic tick species [39], and this is in accordance with its  
370 predominance on birds in central-south Hungary during the spring, and central-southeastern  
371 Hungary in the autumn (i.e., the warmest regions of the country: Supplementary Figure 1).

372 On the other hand, the reason for the absence of *I. frontalis* from birds in the southern part  
373 of Hungary maybe twofold. First, the relevant sampling locations are near water surfaces  
374 where the predominant bird species (e.g., Savi's Warbler, *L. luscinioides*) are not known to  
375 be hosts or (e.g., the Sedge Warbler, *A. schoenobaenus*) are exceptional hosts of this tick  
376 species [32]. Second, in these places bird mist-netting (i.e., tick collection) was terminated  
377 sooner than the late autumn peak activity of *I. frontalis* in the relevant region [40].

378 In this study, *H. rufipes* was only found in the Transdanubian region and once along  
379 the southern Danube, in line with the reported 130-year-long endemicity of *Hyalomma*  
380 species in the country [12–14]. While *Hyalomma*-infestation was previously reported on  
381 non-water-associated bird species (*E. rubecula*, *C. communis*) in the springtime in north-  
382 central Hungary (Ócsa) [25,26], this is the first occasion when ticks of this genus were  
383 observed on reed-dwelling birds in another region of Hungary, in a different season (during  
384 summer). This also raises the question on what the differences between the relevant two  
385 habitats in terms of landscape, vegetation and avian hosts are.

386 Fenékpusztá Bird Ringing Station is situated next to Lake Balaton. Here, the reedbed  
387 habitat in the riparian zone narrows to about 150 meters at the site of the mist-nets, where  
388 12 pieces of these stretch across the reedbed completely. Due to uninterrupted reeds, this is  
389 an important stopover site for migrating passerines, particularly *Acrocephalus*-species. Based  
390 on ringing data, mostly long-distance migrant Sedge Warblers (*A. schoenobaenus*) and  
391 Eurasian Reed Warblers (*A. scirpaceus*) stop in this area, but Great Reed Warblers (*A.*  
392 *arundinaceus*) and Savi's Warblers (*L. luscinioides*) are also significant in numbers.

393 Conversely, in Ócsa Bird Ringing Station the heterogeneous reedbed habitats of the  
394 capture locations are interspersed with fast growing shrubs as elderberry (*Sambucus nigra*)  
395 and blackberry (*Rubus fruticosus*), with softwood stands (*Salix* spp. and *Populus* spp.) form



396 most of the vegetation. Thus, the Eurasian Blackcap (*Sylvia atricapilla*) and the European  
397 Robin (*Erithacus rubecula*) are two most common short-to-mid-distance migratory species  
398 here [17]. Regarding the capture rates of the species groups of migrating passerines, there is  
399 a significant difference between the homogeneous reedbed and other habitats (where the  
400 reedbed is patchy and alternates with deciduous forests, berry bushes). While *Acrocephalus*  
401 spp. account for the largest proportion of birds caught in Fenékpuszta, bush-dwelling  
402 warblers present a higher portion in Ócsa.

403         Based on the above, the existence of at least one indigenous population of *H. rufipes*  
404 is evidenced in the western part of Transdanubia, near Lake Balaton, because of the  
405 following reasons: (1) most importantly, the recognized avian hosts of *H. rufipes* were  
406 extremely unlikely to arrive from abroad shortly prior to their examination, especially not all  
407 five of them; (2) one larva was not yet engorged; (3) the larva and the nymphs (in a similar  
408 state of engorgement) were offspring of two females and must have belonged to different  
409 local generations (Figure 2); and (4) all *H. rufipes* found in the relevant location were  
410 identical in their haplotypes based on three maternally inherited mitochondrial markers,  
411 probably reflecting founder effect.

412         In addition, adults of *H. rufipes* are known to occur in the western part of the  
413 Carpathian Basin for 130 years, and in the same county (Zala) with its present collections  
414 adults of this tick species were found to infest cattle repeatedly [8]. Small local populations  
415 of *H. rufipes* were proposed to explain the occasional presence of *H. rufipes* in Russia [41,42]  
416 and its populations in scattered areas are also known in north Africa [42,43]. However, to  
417 our knowledge, this is the first report of a similar phenomenon and its evidence from  
418 Europe. The most important limiting factor for the survival of this xerophilic tick species  
419 under any climate is thought to be the maximum level of precipitation (annual rainfall) which

420 is around 650 mm in southwestern Hungary (Supplementary Figure 1), i.e., similar to what is  
421 well-tolerated by *H. rufipes* in its range within Africa [44,45]. Populations of these ticks  
422 probably can survive winter conditions as adults in southwestern Hungary where winter  
423 temperatures are among the mildest in the country (Supplementary Figure 1). Nevertheless,  
424 *H. rufipes* is known to have populations in regions with up to 120 days of frost [42]. It is also  
425 noteworthy here that the likely overwintering of *H. rufipes* was reported in the Czech  
426 Republic [9], north of Hungary. Importantly, the discovered *H. rufipes* population might act  
427 as a "stepping-stone" for this tick species during its northward transportation by birds which  
428 use the relevant habitat near Lake Balaton in southwestern Hungary as a stopover site (see  
429 above).

430 On the other hand, no evidence was gained for any further *Hyalomma* populations  
431 indigenous in other regions of Hungary, as also indicated by the overall absence of  
432 *Hyalomma* ticks from birds in the autumn migration period. Thus, also taking into account  
433 the over-century-long presence of adult *Hyalomma* ticks, up to now there was no evidence  
434 for their emergence in the Carpathian Basin, but here evidence is reported for the  
435 emergence of a local population for the first time.

436 Similarly relevant to a broader, international context, the most important aim of the  
437 present study was also fulfilled, i.e., it was successful to demonstrate discrepancies between  
438 sampling sites, indicating that in the above context single-site surveys may be biased (not  
439 informative) on the actual risk posed by birds in transporting ticks in a geographical region or  
440 country. Therefore, to state the emergence or increasing presence of a *Hyalomma* species,  
441 ticks should be collected (larvae and nymphs from birds, and/or adults from reproductive  
442 hosts) extensively and annually in different regions of suspected endemic areas,

443 preferentially by unbiased professionals who should stick to a standard methodology  
444 (sampling protocol).

445

446

#### 447 **Abbreviation**

448 *cox1* - cytochrome *c* oxidase subunit I

449

#### 450 **Declarations**

451

#### 452 **Ethics approval**

453 The study was carried out according to the national animal welfare regulations (28/1998). All  
454 songbirds were handled and released by experienced ringers of BirdLife Hungary.

455 License for bird ringing was issued by the Pest County Government Authority  
456 ([/https://www.mme.hu/sites/default/files/pe\\_ktf\\_97\\_13\\_2017\\_vvt.pdf](https://www.mme.hu/sites/default/files/pe_ktf_97_13_2017_vvt.pdf)).

457

#### 458 **Consent to participate**

459 Not applicable.

460

#### 461 **Consent for publication**

462 Not applicable.

463

#### 464 **Availability of data and materials**

465 The sequences obtained during this study are deposited in GenBank under the following  
466 accession numbers: *cox1* (OQ108291-OQ108294), 16S rRNA (OQ103402-OQ103405), 12S

467 rRNA (OQ103398-OQ103401). All other relevant data are included in the manuscript and the  
468 references or are available upon request by the corresponding author.

469

#### 470 **Competing interests**

471 The authors declare that they have no competing interests.

472

#### 473 **Funding**

474 The study was funded by the Eötvös Loránd Research Network (ELKH), Hungary (Project No.  
475 1500107).

476

#### 477 **Authors' contributions**

478 GK: conceptualization, study design, sample collection, tick species identification, manuscript  
479 writing. TC, AB, AH, AM, ÁN, BK, EAT, JG, OK: study design, sample collection, data curation.  
480 DK: ornithological categorization, manuscript writing. ADS: study design, supervision. ZK:  
481 study organization, data availability. SH: conceptualization, study design, DNA extraction,  
482 molecular analyses, manuscript writing, preparation of figures.

483

#### 484 **Acknowledgement**

485 The authors are grateful to Ms. Nóra Takács for performing PCRs, to Dr. Jenő Kontschán for  
486 his advice in the terminology and definition of populations and to Németh Anna for her  
487 participation in field trips. The authors also thank all staff members and ringing personnel  
488 who contributed to the sample collection.

489

#### 490 **References**

- 491 1. Rochlin I, Toledo A. Emerging tick-borne pathogens of public health importance: a mini-  
492 review. *J Med Microbiol.* 2020;69:781–91.  
493
- 494 2. Estrada-Peña A, Mihalca AD, Petney TN. Ticks of Europe and North Africa: a guide to  
495 species identification. Springer; 2017.  
496
- 497 3. Hoogstraal H, Kaiser MN, Traylor MA, Gaber S, Guindy E. Ticks (Ixodoidea) on birds  
498 migrating from Africa to Europe and Asia. *Bull World Health Organ. World Health*  
499 *Organization;* 1961;24:197.  
500
- 501 4. Brinck P, Svedmyr A, von Zeipel G. Migrating birds at Ottenby Sweden as carriers of ticks  
502 and possible transmitters of tick-borne encephalitis virus. *Oikos. JSTOR;* 1965;88–99.  
503
- 504 5. Capek M, Literak I, Kocianova E, Sychra O, Najer T, Trnka A, et al. Ticks of the *Hyalomma*  
505 *marginatum* complex transported by migratory birds into Central Europe. *Ticks Tick-Borne*  
506 *Dis.* 2014;5:489–93.  
507
- 508 6. Hansford KM, Carter D, Gillingham EL, Hernandez-Triana LM, Chamberlain J, Cull B, et al.  
509 *Hyalomma rufipes* on an untraveled horse: Is this the first evidence of *Hyalomma* nymphs  
510 successfully moulting in the United Kingdom? *Ticks Tick-Borne Dis. Elsevier;* 2019;10:704–8.  
511
- 512 7. Uiterwijk M, Ibanez-Justicia A, van de Vossenberg B, Jacobs F, Overgaauw P, Nijse R, et al.  
513 Imported *Hyalomma* ticks in the Netherlands 2018-2020. *Parasit Vectors. London: Bmc;*  
514 2021;14:244.

515

516 8. Hornok S, Horváth G. First report of adult *Hyalomma marginatum rufipes* (vector of  
517 Crimean-Congo haemorrhagic fever virus) on cattle under a continental climate in Hungary.  
518 *Parasit Vectors*. 2012;5:170.

519

520 9. Rudolf I, Kejikova R, Vojtisek J, Mendel J, Penazziova K, Hubalek Z, et al. Probable  
521 overwintering of adult *Hyalomma rufipes* in Central Europe. *Ticks Tick-Borne Dis*. Munich:  
522 Elsevier Gmbh; 2021;12:101718.

523

524 10. Bah MT, Grosbois V, Stachurski F, Muñoz F, Duhayon M, Rakotoarivony I, et al. The  
525 Crimean-Congo haemorrhagic fever tick vector *Hyalomma marginatum* in the south of  
526 France: Modelling its distribution and determination of factors influencing its establishment  
527 in a newly invaded area. *Transbound Emerg Dis*. Wiley Online Library; 2022;69:e2351–65.

528

529 11. Krézsek C, Bally AW. The Transylvanian Basin (Romania) and its relation to the Carpathian  
530 fold and thrust belt: Insights in gravitational salt tectonics. *Mar Pet Geol*. Elsevier;  
531 2006;23:405–42.

532

533 12. Karpelles L. Adalékok Magyarország atka-faunájához. Akadémia Kiadó; 1893.

534

535 13. Kotlán S. Adatok a hazai kullancs-fauna ismeretéhez [Data on the Hungarian tick fauna].  
536 *Állattani Közlöny*. 1919;18:33–6.

537

- 538 14. Kotlán S. Adatok a hazai kullancs-fauna ismeretéhez [The Classification of the Ticks of  
539 Hungary]. *Állattani Közlöny*. 1921;20.  
540
- 541 15. Földvári G, Szabó É, Tóth GE, Lanszki Z, Zana B, Varga Z, et al. Emergence of *Hyalomma*  
542 *marginatum* and *Hyalomma rufipes* adults revealed by citizen science tick monitoring in  
543 Hungary. *Transbound Emerg Dis*. Wiley Online Library; 2022;  
544
- 545 16. Janisch M. Kullancsgazda madarak különféle betegségek közvetítői [Tick carrier birds  
546 spreading disease agents]. *Aquila*. 1960;67–68:191–4.  
547
- 548 17. Csörgő T, Harnos A, Rózsa L, Karcza Z, Fehérvári P. Detailed description of the Ócsa Bird  
549 Ringing Station, Hungary. *Ornis Hung*. 2016;24:91–108.  
550
- 551 18. Csörgő T, Karcza Z, Halmos G, Magyar G, Gyurácz J, Szép T, et al. Magyar madárvonulási  
552 atlasz [Atlas of bird migration in Hungary]. Budapest: Kossuth kiadó; 2009.  
553
- 554 19. Folmer O, Black M, Hoeh W, Lutz R, Vrijenhoek R. DNA primers for amplification of  
555 mitochondrial cytochrome c oxidase subunit I from diverse metazoan invertebrates. *Mol*  
556 *Mar Biol Biotechnol*. 1994;3:294–9.  
557
- 558 20. Black 4th WC, Piesman J. Phylogeny of hard-and soft-tick taxa (Acari: Ixodida) based on  
559 mitochondrial 16S rDNA sequences. *Proc Natl Acad Sci*. National Acad Sciences;  
560 1994;91:10034–8.  
561

- 562 21. Beati L, Keirans JE. Analysis of the systematic relationships among ticks of the genera  
563 Rhipicephalus and Boophilus (Acari: Ixodidae) based on mitochondrial 12S ribosomal DNA  
564 gene sequences and morphological characters. J Parasitol. 2001;87:32–48.  
565
- 566 22. Bitencourth K, Voloch CM, Serra-Freire NM, Machado-Ferreira E, Amorim M, Gazêta GS.  
567 Analysis of Amblyomma sculptum haplotypes in an area endemic for Brazilian spotted fever.  
568 Med Vet Entomol. Wiley Online Library; 2016;30:342–50.  
569
- 570 23. Burkman EJ. Genetic structure of Amblyomma cajennense (Acari: Ixodidae) populations  
571 based on mitochondrial gene sequences. 2009;  
572
- 573 24. Hornok S, Karcza Z, Csörgő T. Birds as disseminators of ixodid ticks and tick-borne  
574 pathogens: note on the relevance to migratory routes. Ornis Hung. 2012;20:86–9.  
575
- 576 25. Hornok S, Csörgő T, de la Fuente J, Gyuranecz M, Privigyei C, Meli ML, et al. Synanthropic  
577 birds associated with high prevalence of tick-borne rickettsiae and with the first detection of  
578 Rickettsia aeschlimannii in Hungary. Vector Borne Zoonotic Dis Larchmt N. 2013;13:77–83.  
579
- 580 26. Hornok S, Flaisz B, Takács N, Kontschán J, Csörgő T, Csipak Á, et al. Bird ticks in Hungary  
581 reflect western, southern, eastern flyway connections and two genetic lineages of Ixodes  
582 frontalis and Haemaphysalis concinna. Parasit Vectors. 2016;9:101.  
583
- 584 27. Wilhelmsson P, Jaenson TGT, Olsen B, Waldenstrom J, Lindgren P-E. Migratory birds as  
585 disseminators of ticks and the tick-borne pathogens Borrelia bacteria and tick-borne



- 586 encephalitis (TBE) virus: a seasonal study at Ottenby Bird Observatory in South-eastern  
587 Sweden. *Parasit Vectors*. London: Bmc; 2020;13:607.
- 588
- 589 28. Heylen D, Fonville M, Docters van Leeuwen A, Stroo A, Duisterwinkel M, van Wieren S, et  
590 al. Pathogen communities of songbird-derived ticks in Europe's low countries. *Parasit*  
591 *Vectors*. 2017;10:497.
- 592
- 593 29. Klaus C, Gethmann J, Hoffmann B, Ziegler U, Heller M, Beer M. Tick infestation in birds  
594 and prevalence of pathogens in ticks collected from different places in Germany. *Parasitol*  
595 *Res*. 2016;115:2729–40.
- 596
- 597 30. Toma L, Mancuso E, d'Alessio SG, Menegon M, Spina F, Pascucci I, et al. Tick species from  
598 Africa by migratory birds: a 3-year study in Italy. *Exp Appl Acarol*. Dordrecht: Springer;  
599 2021;83:147–64.
- 600
- 601 31. Buczek AM, Buczek W, Buczek A, Bartosik K. The potential role of migratory birds in the  
602 rapid spread of ticks and tick-borne pathogens in the changing climatic and environmental  
603 conditions in Europe. *Int J Environ Res Public Health*. MDPI; 2020;17:2117.
- 604
- 605 32. Keve G, Sandor AD, Hornok S. Hard ticks (Acari: Ixodidae) associated with birds in Europe:  
606 Review of literature data. *Front Vet Sci*. Lausanne: Frontiers Media Sa; 2022;9:928756.
- 607
- 608 33. Janisch M. A hazai kullancsfauna feltérképezése [Geographical distribution of tick species  
609 in Hungary]. *Állattani Közlöny*. 1959;47:103–10.

610

611 34. Magano SR, Els DA, Chown SL. Feeding patterns of immature stages of *Hyalomma*  
612 *truncatum* and *Hyalomma marginatum rufipes* on different hosts. *Exp Appl Acarol.* Springer;  
613 2000;24:301–13.

614

615 35. Hornok S, Cutajar B, Takács N, Galea N, Attard D, Coleiro C, et al. On the way between  
616 Africa and Europe: Molecular taxonomy of ticks collected from birds in Malta. *Ticks Tick-*  
617 *Borne Dis.* Elsevier; 2022;13:102001.

618

619 36. Márquez FJ, Caruz A. Phylogeography of *Hyalomma* (*Euhyalomma*) *lusitanicum* (Acarina,  
620 *Parasitiformes, Ixodidae*) in Andalusia based on mitochondrial cytochrome oxidase I gene.  
621 *Exp Appl Acarol.* Springer; 2021;85:49–61.

622

623 37. Hornok S. Allochronic seasonal peak activities of *Dermacentor* and *Haemaphysalis* spp.  
624 under continental climate in Hungary. *Vet Parasitol.* Elsevier; 2009;163:366–9.

625

626 38. Akimov IA, Nebogatkin IV. Distribution of Ticks from the Genus *Dermacentor* (Acari,  
627 *Ixodidae*) in Ukraine. *Вестник Зоології. Інститут зоології ім. ІІ Шмальгаузена НАН*  
628 *України*; 2011;

629

630 39. Hubálek Z, Halouzka J, Juricova Z. Host-seeking activity of ixodid ticks in relation to  
631 weather variables. *J Vector Ecol. Society for Vector Ecology*; 2003;28:159–65.

632

- 633 40. Reynolds C, Kontschán J, Takács N, Solymosi N, Sándor AD, Keve G, et al. Shift in the  
634 seasonality of ixodid ticks after a warm winter in an urban habitat with notes on  
635 morphotypes of *Ixodes ricinus* and data in support of cryptic species within *Ixodes frontalis*.  
636 *Exp Appl Acarol*. Springer; 2022;88:127–38.
- 637
- 638 41. Pomerantsev BI. *Ixodid Ticks (Ixodidae)*. American Institute of Biological Sciences; 1959.
- 639
- 640 42. Hoogstraal H. *African Ixodoidea. Vol. I. Ticks of the Sudan (with special reference to*  
641 *Equatoria Province and with Preliminary Reviews of the Genera Boophilus, Margaropus, and*  
642 *Hyalomma)*. *Afr Ixodoidea Vol Ticks Sudan Spec Ref Equat Prov Prelim Rev Genera Boophilus*  
643 *Margaropus Hyalomma* [Internet]. 1956 [cited 2023 Jan 11]; Available from:  
644 <https://www.cabdirect.org/cabdirect/abstract/19572901469>
- 645
- 646 43. Wallmenius K, Barboutis C, Fransson T, Jaenson TGT, Lindgren P-E, Nystrom F, et al.  
647 Spotted fever *Rickettsia* species in *Hyalomma* and *Ixodes* ticks infesting migratory birds in  
648 the European Mediterranean area. *Parasit Vectors*. London: BMC; 2014;7:318.
- 649
- 650 44. Kiros S, Awol N, Tsegaye Y, Hadush B. Hard Ticks of Camel in Southern Zone of Tigray,  
651 Northern Ethiopia. *J Parasitol Vector Biol*. 2014;6:151–5.
- 652
- 653 45. Kerario II, Muleya W, Chenyambuga S, Koski M, Hwang S-G, Simuunza M. Abundance and  
654 distribution of ixodid tick species infesting cattle reared under traditional farming systems in  
655 Tanzania. *Afr J Agric Res. Academic Journals*; 2017;12:286–99.
- 656

## 657 **Figure Legends**

658 **Figure 1.** Map of Hungary showing ringing stations and the ratio of tick species collected in  
659 (A) the first semiannual period (March to July) and (B) the second semiannual period (August  
660 to November). In the former (A) the location of the first *Hyalomma* nymph reported from a  
661 bird in Hungary in 1955 is marked with a red dot, and the place where adult *Hyalomma*  
662 *rufipes* ticks were found on cattle is indicated with a red star.

663

664 **Figure 2.** Illustration of the possible consequences of bird-borne transportation of  
665 *Hyalomma rufipes* into countries north of the Mediterranean Basin, including Hungary.  
666 Green arrows indicate molting. (A) Nymphs transported by birds may die after drop-off, or  
667 (B) molt to adult which cannot overwinter, or (C) if they overwinter as adults, females will  
668 not produce eggs in the absence of previous mating, or (D) if nymphs carried by birds detach  
669 and molt to male and another (carried independently) to female and these meet and mate  
670 on cattle, females will be able to lay eggs after drop-off. First generation larvae and nymphs  
671 developing from these eggs probably will have a similar state of engorgement but molting to  
672 adults they will find host and will mate at different time. Therefore, existence of a second  
673 generation may involve the simultaneous presence of larvae and nymphs of different  
674 cohorts on local birds, as shown in this study.

675

676 **Supplementary Figure 1.** The average annual precipitation (<https://www.met.hu/>) and  
677 temperature (<https://www.mozaweb.com/search?search=középhőmérséklet>) in January in  
678 Hungary, based on data from the Hungarian Meteorological Service (OMSZ). The site of the  
679 discovered *Hyalomma rufipes* population is marked with a star.

**A**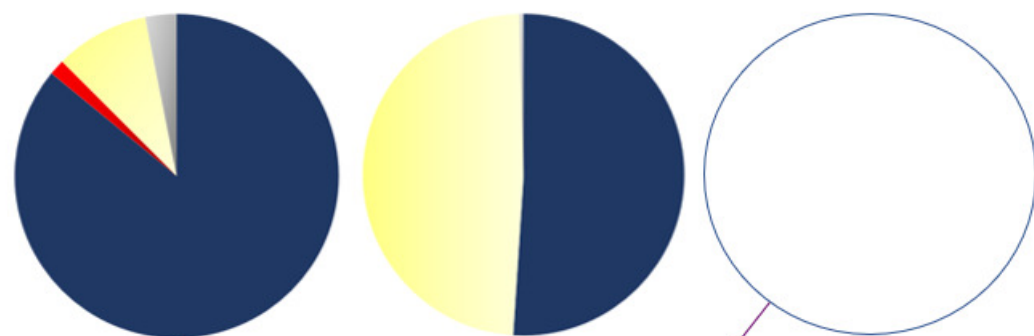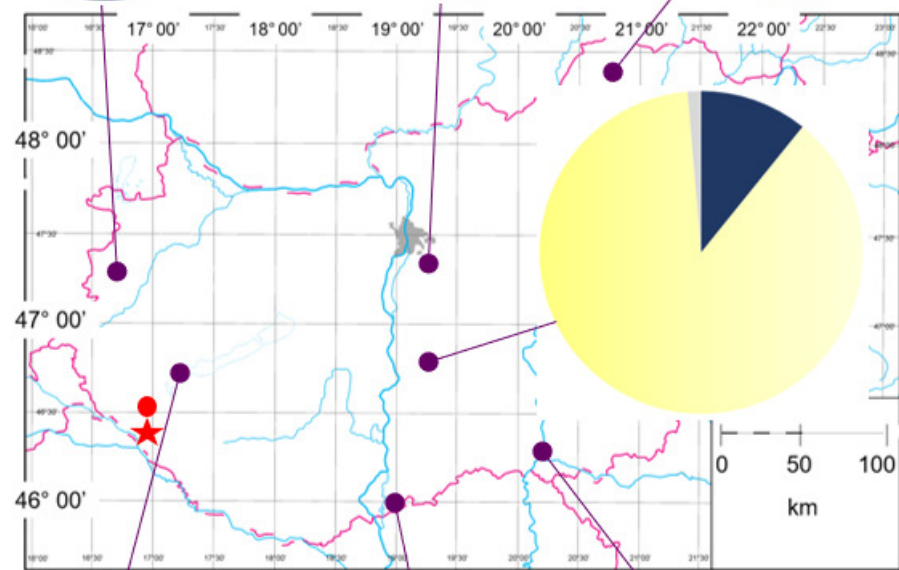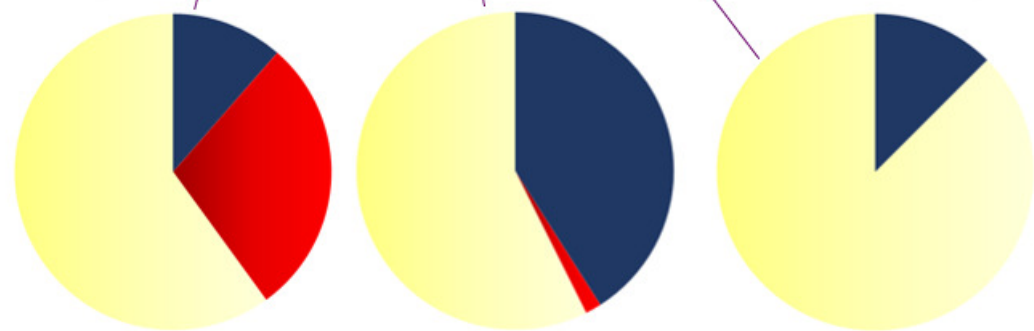

■ *Ixodes ricinus* ■ *Hyalomma rufipes* ■ *Haemaphysalis concinna* ■ *Ixodes frontalis*

**B**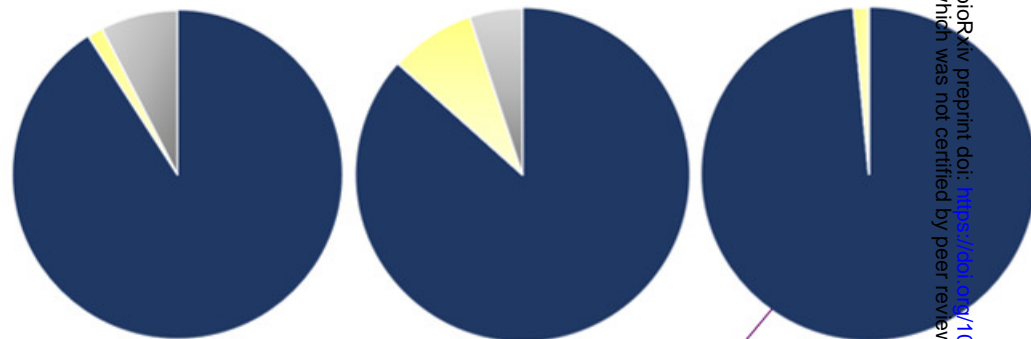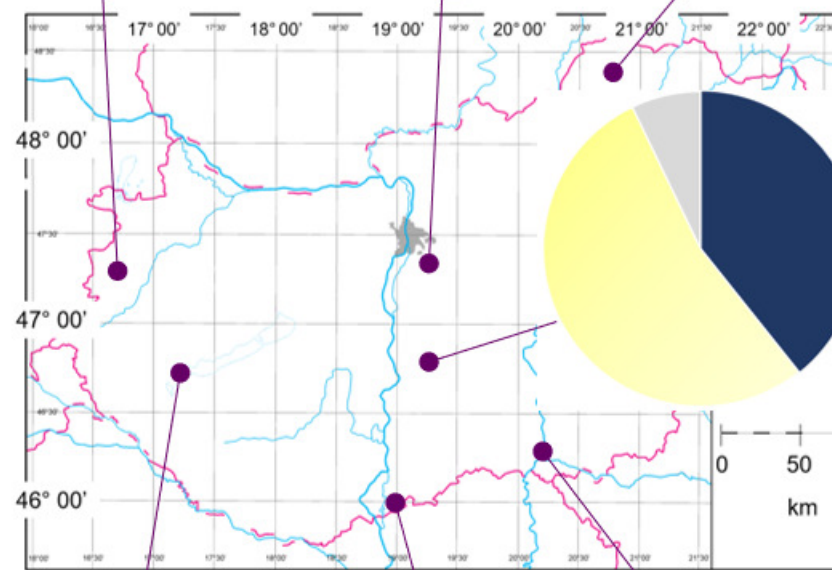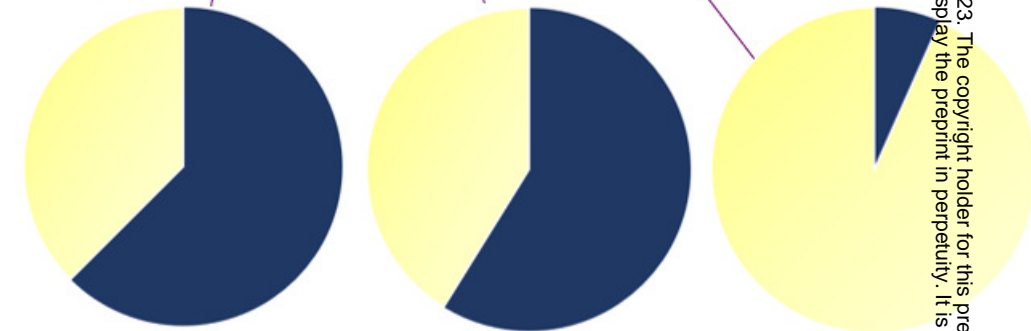

■ *Ixodes ricinus* ■ *Hyalomma rufipes* ■ *Haemaphysalis concinna* ■ *Ixodes frontalis*

bioRxiv preprint doi: <https://doi.org/10.1101/2023.01.13.523881>; this version posted January 16, 2023. The copyright holder for this preprint (which was not certified by peer review) is the author/funder, who has granted bioRxiv a license to display the preprint in perpetuity. It is made available under aCC-BY-NC-ND 4.0 International license.

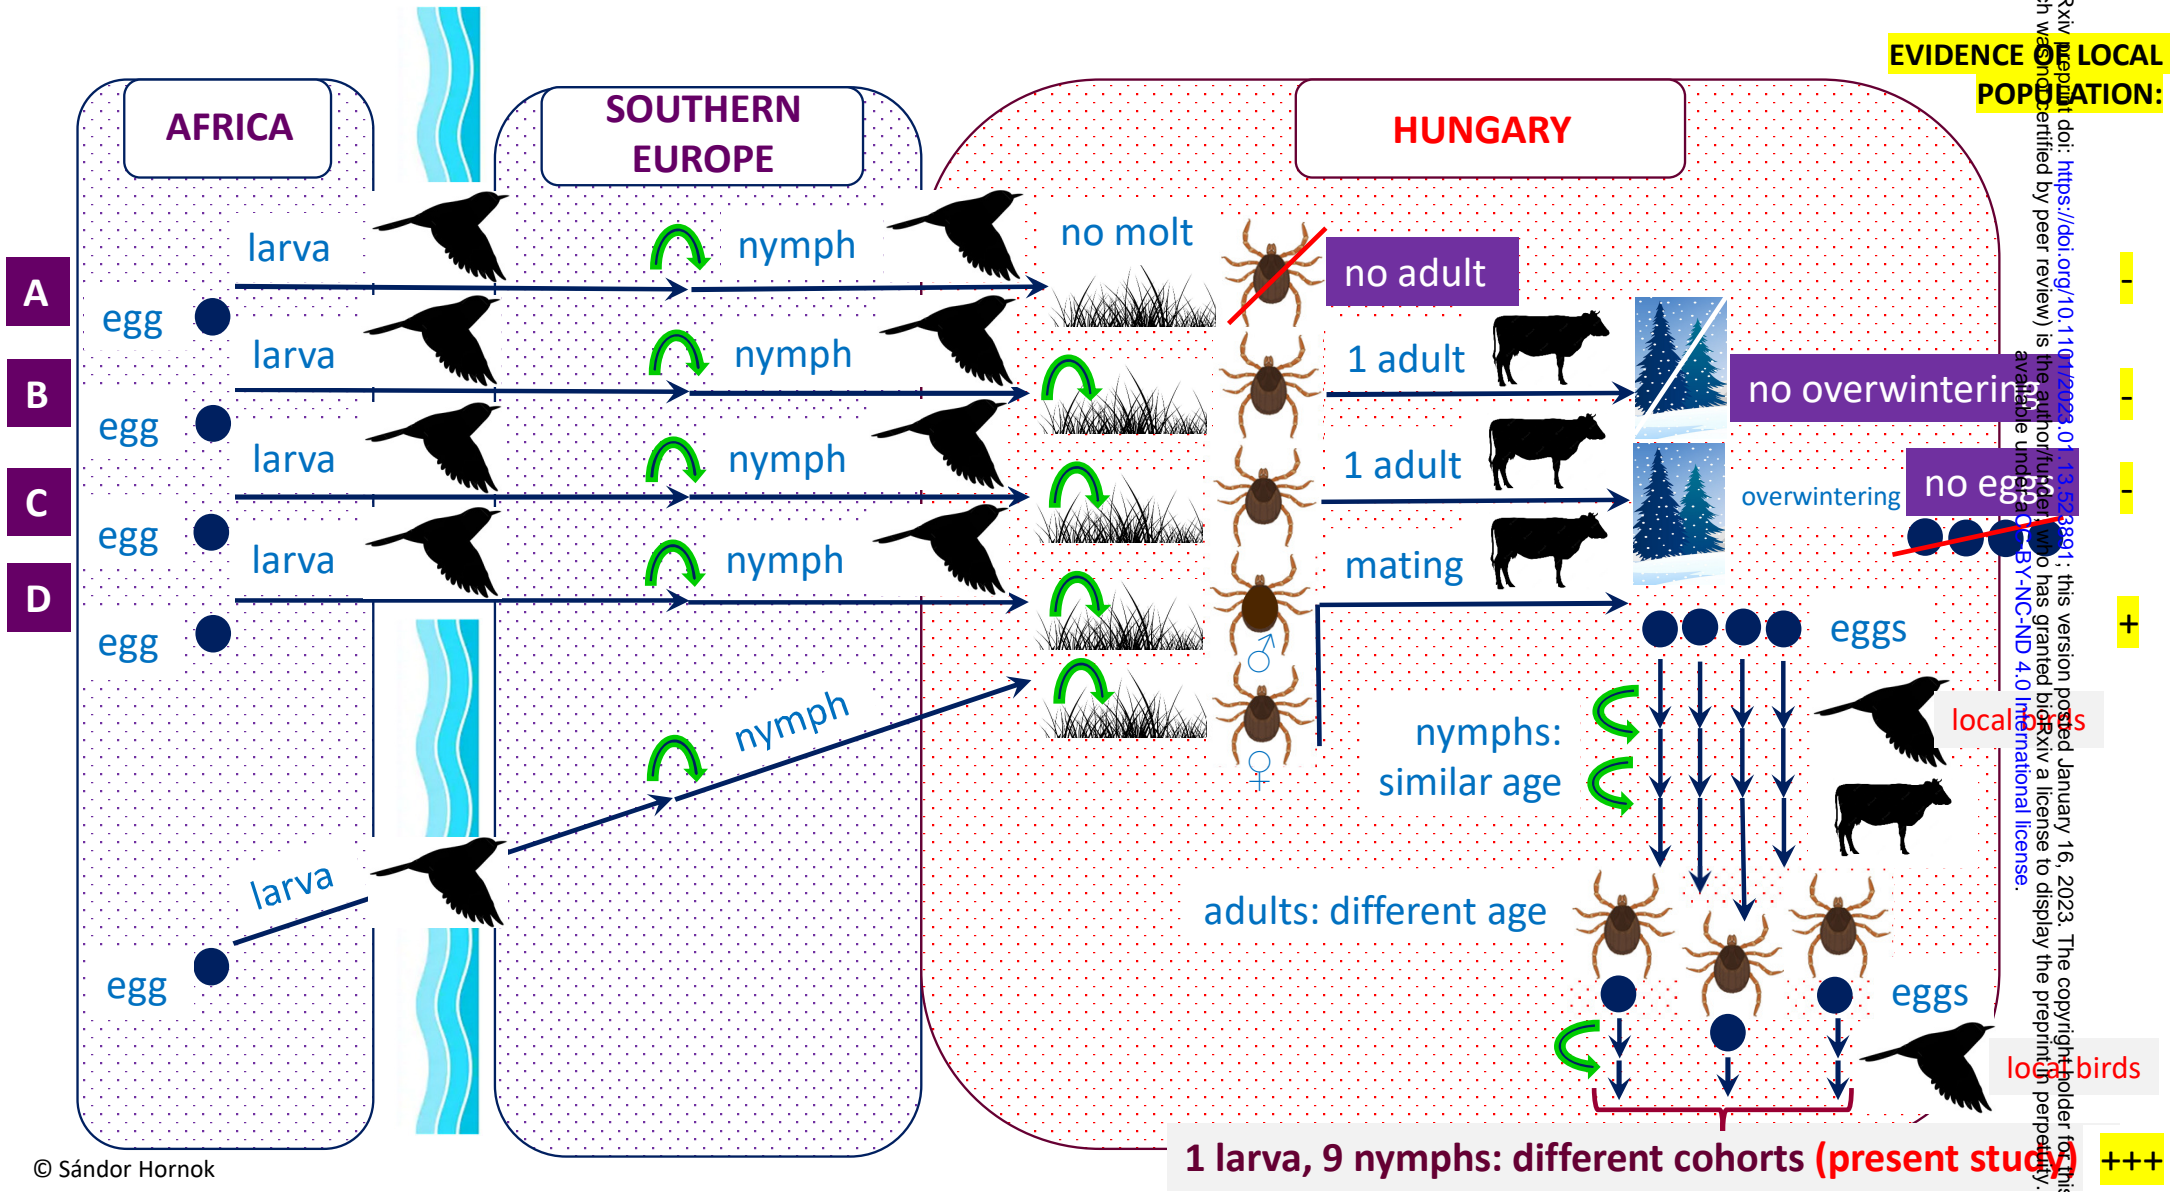

**EVIDENCE OF LOCAL POPULATION:**

bioRxiv preprint doi: <https://doi.org/10.1101/2023.01.13.523891>; this version posted January 16, 2023. The copyright holder for this preprint (which was not certified by peer review) is the author/funder, who has granted bioRxiv a license to display the preprint in perpetuity. It is made available under aCC-BY-NC-ND 4.0 International license.

-  
 -  
 -  
 +  
 local insects  
 local birds  
 +++

**Table 1.** Data of *Hyalomma* ticks collected in 2022 from birds at various ringing stations in Hungary. Identical background color in cells of the same column of a genetic marker indicates identical sequences.

| Isolate code | Bird species | Date     | Region of Hungary (location) | <i>Hyalomma</i> sp. (number, stage) | GenBank accession numbers according to the three genetic markers |          |          |
|--------------|--------------|----------|------------------------------|-------------------------------------|------------------------------------------------------------------|----------|----------|
|              |              |          |                              |                                     | 16S rRNA                                                         | Cox1     | 12S rRNA |
| BA2          | SYL COM      | May 14   | south (Dávod)                | <i>H. rufipes</i> (1×N)             | OQ103402                                                         | OQ108291 | OQ103398 |
| GJ10         | FIC HYP      | April 23 | northwest (Tömörd)           | <i>H. rufipes</i> (1×N)             | OQ103403                                                         | OQ108292 | OQ103399 |
| BE02         | ACR SCH      | June 26  | southwest (Fenekpuszta)      | <i>H. rufipes</i> (1×N)             | OQ103404                                                         | OQ108293 | OQ103400 |
| BE03         | ACR SCH      | June 26  | southwest (Fenekpuszta)      | <i>H. rufipes</i> (1×N)             | OQ103404                                                         | OQ108293 | OQ103400 |
| BE04         | ACR SCH      | June 26  | southwest (Fenekpuszta)      | <i>H. rufipes</i> (1×N)             | OQ103404                                                         | OQ108293 | OQ103400 |
| BE05         | PAN BIA      | June 26  | southwest (Fenekpuszta)      | <i>H. rufipes</i> (1×N)             | OQ103405                                                         | OQ108294 | OQ103401 |
| BE06         | PAN BIA      | June 26  | southwest (Fenekpuszta)      | <i>H. rufipes</i> (1×L, 5×N)        | OQ103405                                                         | OQ108294 | OQ103401 |

**Abbreviations:**

ACR SCH = *Acrocephalus schoenobaenus*, FIC HYP = *Ficedula hypoleuca*, PAN BIA = *Panurus biarmicus*, SYL COM = *Sylvia communis*
